# Supplementary material
Source: publisher figshare collection journal article supplement (https://acs.figshare.com/ndownloader/files/5165692)
Supplement: Supplementary file 1 [file 5165692]

data_global

# 1. SUBMISSION DETAILS

_publ_contact_autor
;
        Dr. Bas de Bruin
        Department of Inorganic Chemistry
        University of Nijmegen
        Toernooiveld 1
        6525 ED  Nijmegen
        The Netherlands
;
_publ_contact_author_phone        '031 024 3652064'
_publ_contact_author_fax          '031 024 3553450'
_publ_contact_author_email        BdeBruin@sci.kun.nl
_publ_requested_journal           'Organometallics'
_publ_requested_coeditor_name     ?
_publ_requested_manuscript_number 'OM049654x'
_publ_contact_letter
;
;

#==============================================================================

# 3. AUTHOR LIST

loop_
 _publ_author_name
 _publ_author_address
     'Hetterscheid, Dennis G.H.'
;    Department of Inorganic Chemistry
     Nijmegen SON Research Center
     University of Nijmegen
     Toernooiveld 1
     6525 ED  Nijmegen
     The Netherlands
;
     'Smits, Jan M. M.'
;    Department of Inorganic Chemistry
     Nijmegen SON Research Center
     University of Nijmegen
     Toernooiveld 1
     6525 ED  Nijmegen
     The Netherlands
;
     'de Bruin, Bas'
;    Department of Inorganic Chemistry
     Nijmegen SON Research Center
     University of Nijmegen
     Toernooiveld 1
     6525 ED  Nijmegen
     The Netherlands
;

#==============================================================================

# 4. TEXT

_publ_section_title
;
Rhodium \h^1^-Norbornenyl Copmplexes; Possibilities for Catalitic
Oxidation of Norbornadiene to Norbornenone
;
_publ_section_abstract
;
;
_publ_section_references
;
Beurskens, P. T., Beurskens, G., Bosman, W. P., Gelder, R. de,
Garc\'ia-Granda, S., Gould, R. O., Isra\"el, R. & Smits, J. M. M. (1996).
DIRDIF-96, A computer program system for crystal structure determination by
Patterson methods and direct methods applied to difference structure factors.
Crystallography Laboratory, University of Nijmegen, The Netherlands.

Beurskens, P. T., Beurskens, G., Strumpel, M. & Nordman, C. E. (1987).
In Patterson and Pattersons, pp. 356--367. Glusker, J. P., Patterson,
B. K. & Rossi, M., Eds. Oxford, England: Clarendon Press.

Duisenberg, A.J.M. (1998).
Reflections on area detectors, PhD Thesis, Utrecht University,
Utrecht, The Netherlands.

International Tables for X-ray Crystallography (1974).
Vol. IV, Birmingham, England: Kynoch Press.

Nonius B.V. (1999).
COLLECT, data collection software. Delft, The Netherlands.

Sheldrick, G.M. (1996).
SADABS. Program for Emperical Absorption Correction.
University of G\"ottingen, Germany.

Sheldrick, G. M. (1997).
SHELXL-97, Program for the refinement of
crystal structures. University of G\"ottingen, Germany.

Spek, A. L. (2003).
PLATON. A Multipurpose Crystallographic Tool. Utrecht University,
Utrecht, The Netherlands.
;
_publ_section_figure_captions
;
;
_publ_section_acknowledgements
;
;

#==============================================================================

data_HET10

_audit_creation_method            'SHELXL, adapted and expanded'
_audit_creation_date              2003-12-08
_chemical_name_systematic
;
 ?
;
_chemical_name_common             ?
_chemical_formula_moiety          ?
_chemical_formula_sum
 'C20 H23 F6 N3 P Rh'
_chemical_formula_weight          553.29

loop_
 _atom_type_symbol
 _atom_type_description
 _atom_type_scat_dispersion_real
 _atom_type_scat_dispersion_imag
 _atom_type_scat_source
 'C'  'C'   0.0033   0.0016
 'International Tables Vol C Tables 4.2.6.8 and 6.1.1.4'
 'H'  'H'   0.0000   0.0000
 'International Tables Vol C Tables 4.2.6.8 and 6.1.1.4'
 'N'  'N'   0.0061   0.0033
 'International Tables Vol C Tables 4.2.6.8 and 6.1.1.4'
 'Rh'  'Rh'  -1.1178   0.9187
 'International Tables Vol C Tables 4.2.6.8 and 6.1.1.4'
 'P'  'P'   0.1023   0.0942
 'International Tables Vol C Tables 4.2.6.8 and 6.1.1.4'
 'F'  'F'   0.0171   0.0103
 'International Tables Vol C Tables 4.2.6.8 and 6.1.1.4'

_symmetry_cell_setting            monoclinic
_symmetry_space_group_name_H-M    'P 21/n'

loop_
 _symmetry_equiv_pos_as_xyz
 'x, y, z'
 '-x+1/2, y+1/2, -z+1/2'
 '-x, -y, -z'
 'x-1/2, -y-1/2, z-1/2'

_cell_length_a                    10.8225(12)
_cell_length_b                    13.335(2)
_cell_length_c                    14.711(3)
_cell_angle_alpha                 90.00
_cell_angle_beta                  93.947(12)
_cell_angle_gamma                 90.00
_cell_volume                      2118.0(6)
_cell_formula_units_Z             4
_cell_measurement_temperature     208(2)
_cell_measurement_reflns_used     62793
_cell_measurement_theta_min       4.530
_cell_measurement_theta_max       27.530

_exptl_crystal_description        'rough fragment'
_exptl_crystal_colour             'transparent yellow'
_exptl_crystal_size_max           0.22
_exptl_crystal_size_mid           0.20
_exptl_crystal_size_min           0.18
#_exptl_crystal_density_meas      'not measured'
_exptl_crystal_density_diffrn     1.735
_exptl_crystal_density_method     'not measured'
_exptl_crystal_F_000              1112
_exptl_absorpt_coefficient_mu     0.947
_exptl_absorpt_correction_type    'SADABS multiscan (Sheldrick, 1996)'
_exptl_absorpt_correction_T_min   1.000
_exptl_absorpt_correction_T_max   1.000

_exptl_special_details
;
 ?
;

_diffrn_ambient_temperature       208(2)
_diffrn_radiation_wavelength      0.71073
_diffrn_radiation_type            MoK\a
_diffrn_radiation_source          'fine-focus sealed tube'
_diffrn_radiation_monochromator   graphite
_diffrn_measurement_device        'Nonius KappaCCD'
_diffrn_measurement_method        'area detector \f and \w scan'
_diffrn_detector_area_resol_mean  18.4
_diffrn_standards_number          0
_diffrn_standards_interval_time   0
_diffrn_standards_decay_%         0.000
_diffrn_reflns_number             62793
_diffrn_reflns_av_R_equivalents   0.0531
_diffrn_reflns_av_sigmaI/netI     0.0239
_diffrn_reflns_limit_h_min        -14
_diffrn_reflns_limit_h_max        14
_diffrn_reflns_limit_k_min        -17
_diffrn_reflns_limit_k_max        17
_diffrn_reflns_limit_l_min        -19
_diffrn_reflns_limit_l_max        19
_diffrn_reflns_theta_min          4.53
_diffrn_reflns_theta_max          27.53
_reflns_number_total              4850
_reflns_number_gt                 3947
_reflns_number_observed           3947
_reflns_threshold_expression      >2sigma(I)
_reflns_observed_criterion        >2sigma(I)

_computing_data_collection
;
Nonius "Collect" program suite (Nonius, 1999)
;
_computing_cell_refinement        ?
_computing_data_reduction
;
Nonius "EvalCCD" program suite (Duisenberg, 1998)
;
_computing_structure_solution
;
DIRDIF (Beurskens et al., 1996),
PATTY (Beurskens et al., 1987)
;
_computing_structure_refinement   'SHELXL-97 (Sheldrick, 1997)'
_computing_molecular_graphics
;
PLATON (Spek, 2003)
;
_computing_publication_material   ?

_refine_special_details
;
 Refinement of F^2^ against ALL reflections.  The weighted R-factor wR and
 goodness of fit S are based on F^2^, conventional R-factors R are based
 on F, with F set to zero for negative F^2^. The threshold expression of
 F^2^ > 2sigma(F^2^) is used only for calculating R-factors(gt) etc. and is
 not relevant to the choice of reflections for refinement.  R-factors based
 on F^2^ are statistically about twice as large as those based on F, and R-
 factors based on ALL data will be even larger.
;

_refine_ls_structure_factor_coef  Fsqd
_refine_ls_matrix_type            full
_refine_ls_weighting_scheme       calc
_refine_ls_weighting_details      
;
w=1/[\s^2^(Fo^2^)+(0.0272P)^2^+1.5373P] where P=(Fo^2^+2Fc^2^)/3
;
_atom_sites_solution_primary      direct
_atom_sites_solution_secondary    difmap
_atom_sites_solution_hydrogens    geom
_refine_ls_hydrogen_treatment     mixed
_refine_ls_extinction_method      none
_refine_ls_extinction_coef        ?
_refine_ls_number_reflns          4850
_refine_ls_number_parameters      341
_refine_ls_number_restraints      0
_refine_ls_R_factor_all           0.0388
_refine_ls_R_factor_gt            0.0265
_refine_ls_R_factor_obs           0.0265
_refine_ls_wR_factor_ref          0.0612
_refine_ls_wR_factor_all          0.0612
_refine_ls_wR_factor_gt           0.0576
_refine_ls_wR_factor_obs          0.0576
_refine_ls_goodness_of_fit_ref    1.023
_refine_ls_goodness_of_fit_all    1.023
_refine_ls_restrained_S_all       1.023
_refine_ls_shift/su_max           0.001
_refine_ls_shift/esd_max          0.001
_refine_ls_shift/su_mean          0.000
_refine_ls_shift/esd_mean         0.000

loop_
 _atom_site_label
 _atom_site_type_symbol
 _atom_site_fract_x
 _atom_site_fract_y
 _atom_site_fract_z
 _atom_site_U_iso_or_equiv
 _atom_site_adp_type
 _atom_site_occupancy
 _atom_site_calc_flag
 _atom_site_refinement_flags
 _atom_site_disorder_assembly
 _atom_site_disorder_group
Rh1 Rh 0.246448(15) 0.209243(13) 0.380466(11) 0.02330(6) Uani 1 d . . .
N1 N 0.32203(16) 0.14911(14) 0.24892(12) 0.0282(4) Uani 1 d . . .
N2 N 0.19022(17) 0.06753(14) 0.42120(13) 0.0294(4) Uani 1 d . . .
N3 N 0.08671(17) 0.17949(15) 0.27952(13) 0.0314(4) Uani 1 d . . .
H3A H 0.0196 0.2167 0.2947 0.038 Uiso 1 calc R . .
C1 C 0.2288(2) 0.38567(18) 0.47738(17) 0.0343(5) Uani 1 d . . .
H1 H 0.1586 0.4236 0.5001 0.041 Uiso 1 calc R . .
C2 C 0.2291(2) 0.36994(17) 0.37489(16) 0.0312(5) Uani 1 d . . .
H2 H 0.1612 0.3765 0.3319 0.037 Uiso 1 calc R . .
C3 C 0.3487(2) 0.34422(17) 0.35735(16) 0.0329(5) Uani 1 d . . .
H3 H 0.3782 0.3300 0.3001 0.039 Uiso 1 calc R . .
C4 C 0.4234(2) 0.34350(18) 0.44916(18) 0.0360(6) Uani 1 d . . .
H4 H 0.5147 0.3463 0.4485 0.043 Uiso 1 calc R . .
C5 C 0.3670(2) 0.24950(19) 0.48938(15) 0.0315(5) Uani 1 d . . .
H5 H 0.4058 0.1871 0.5001 0.038 Uiso 1 calc R . .
C6 C 0.2437(2) 0.27617(18) 0.50719(15) 0.0322(5) Uani 1 d . . .
H6 H 0.1840 0.2351 0.5320 0.039 Uiso 1 calc R . .
C7 C 0.3597(2) 0.42762(19) 0.49981(18) 0.0394(6) Uani 1 d . . .
H7A H 0.3719 0.4940 0.4733 0.047 Uiso 1 calc R . .
H7B H 0.3834 0.4285 0.5653 0.047 Uiso 1 calc R . .
C11 C 0.1229(2) 0.2107(2) 0.18927(16) 0.0380(6) Uani 1 d . . .
H11A H 0.1235 0.2841 0.1855 0.046 Uiso 1 calc R . .
H11B H 0.0626 0.1854 0.1420 0.046 Uiso 1 calc R . .
C12 C 0.2496(2) 0.17049(18) 0.17359(15) 0.0303(5) Uani 1 d . . .
C13 C 0.2898(2) 0.15779(19) 0.08718(16) 0.0379(6) Uani 1 d . . .
H13 H 0.2374 0.1730 0.0354 0.046 Uiso 1 calc R . .
C14 C 0.4075(3) 0.1226(2) 0.07824(18) 0.0430(6) Uani 1 d . . .
H14 H 0.4371 0.1140 0.0202 0.052 Uiso 1 calc R . .
C15 C 0.4813(2) 0.10007(19) 0.15487(18) 0.0394(6) Uani 1 d . . .
H15 H 0.5621 0.0757 0.1496 0.047 Uiso 1 calc R . .
C16 C 0.4367(2) 0.11329(17) 0.24018(16) 0.0307(5) Uani 1 d . . .
C17 C 0.5133(2) 0.0891(2) 0.32542(18) 0.0439(6) Uani 1 d . . .
H17A H 0.5348 0.1507 0.3579 0.066 Uiso 1 calc R . .
H17B H 0.5883 0.0551 0.3102 0.066 Uiso 1 calc R . .
H17C H 0.4665 0.0460 0.3636 0.066 Uiso 1 calc R . .
C21 C 0.0550(2) 0.0720(2) 0.28196(17) 0.0378(6) Uani 1 d . . .
H21A H 0.0915 0.0380 0.2312 0.045 Uiso 1 calc R . .
H21B H -0.0351 0.0647 0.2734 0.045 Uiso 1 calc R . .
C22 C 0.0996(2) 0.02181(18) 0.36933(16) 0.0306(5) Uani 1 d . . .
C23 C 0.0510(2) -0.06938(19) 0.39505(19) 0.0399(6) Uani 1 d . . .
H23 H -0.0123 -0.1003 0.3581 0.048 Uiso 1 calc R . .
C24 C 0.0956(2) -0.11423(19) 0.4746(2) 0.0444(6) Uani 1 d . . .
H24 H 0.0629 -0.1757 0.4930 0.053 Uiso 1 calc R . .
C25 C 0.1892(2) -0.06766(19) 0.5273(2) 0.0437(6) Uani 1 d . . .
H25 H 0.2224 -0.0973 0.5816 0.052 Uiso 1 calc R . .
C26 C 0.2329(2) 0.02264(19) 0.49893(17) 0.0365(6) Uani 1 d . . .
H26 H 0.2956 0.0547 0.5355 0.044 Uiso 1 calc R . .
P1 P 0.77924(6) 0.33681(5) 0.28839(4) 0.03452(15) Uani 1 d . . .
F1A F 0.9012(6) 0.3525(7) 0.3474(5) 0.122(3) Uani 0.614(17) d P A 1
F1B F 0.9199(5) 0.3668(4) 0.2845(18) 0.113(7) Uani 0.386(17) d P A 2
F2A F 0.6412(13) 0.3157(8) 0.294(2) 0.105(9) Uani 0.268(18) d P A 3
F2B F 0.6555(7) 0.3109(3) 0.2330(6) 0.101(3) Uani 0.732(18) d P A 4
F3A F 0.8587(6) 0.3503(4) 0.2057(3) 0.088(3) Uani 0.573(9) d P A 5
F3B F 0.7529(8) 0.4048(8) 0.2022(5) 0.119(4) Uani 0.427(9) d P A 6
F4A F 0.8163(7) 0.2254(7) 0.2957(14) 0.122(6) Uani 0.430(16) d P A 7
F4B F 0.8044(7) 0.2315(7) 0.2451(7) 0.112(3) Uani 0.570(16) d P A 8
F5A F 0.7058(6) 0.3149(10) 0.3732(4) 0.123(4) Uani 0.569(16) d P A 9
F5B F 0.795(3) 0.2753(6) 0.3729(6) 0.182(11) Uani 0.431(16) d P A 10
F6A F 0.7612(16) 0.4303(10) 0.3435(11) 0.142(6) Uani 0.43(3) d P A 11
F6B F 0.7479(5) 0.4498(7) 0.294(2) 0.139(7) Uani 0.57(3) d P A 12

loop_
 _atom_site_aniso_label
 _atom_site_aniso_U_11
 _atom_site_aniso_U_22
 _atom_site_aniso_U_33
 _atom_site_aniso_U_23
 _atom_site_aniso_U_13
 _atom_site_aniso_U_12
Rh1 0.02124(9) 0.02480(9) 0.02332(9) -0.00035(7) -0.00249(6) -0.00186(7)
N1 0.0260(9) 0.0303(10) 0.0277(9) -0.0038(8) -0.0017(7) 0.0010(8)
N2 0.0248(9) 0.0291(10) 0.0339(10) -0.0003(8) -0.0015(8) -0.0025(8)
N3 0.0232(9) 0.0386(11) 0.0318(10) -0.0018(8) -0.0031(8) 0.0044(8)
C1 0.0303(12) 0.0323(13) 0.0411(13) -0.0083(11) 0.0091(10) 0.0008(10)
C2 0.0311(12) 0.0247(11) 0.0372(13) 0.0027(10) -0.0011(10) -0.0006(10)
C3 0.0401(13) 0.0255(12) 0.0343(12) -0.0019(10) 0.0115(10) -0.0064(10)
C4 0.0247(11) 0.0322(13) 0.0510(15) -0.0097(11) 0.0009(10) -0.0051(10)
C5 0.0324(12) 0.0298(11) 0.0310(12) -0.0051(10) -0.0071(10) -0.0003(10)
C6 0.0356(12) 0.0348(14) 0.0264(11) -0.0025(9) 0.0036(9) -0.0072(10)
C7 0.0380(13) 0.0316(13) 0.0480(15) -0.0116(11) -0.0013(11) -0.0043(11)
C11 0.0351(12) 0.0459(14) 0.0315(12) 0.0029(12) -0.0090(10) 0.0056(12)
C12 0.0330(12) 0.0297(12) 0.0275(12) -0.0008(9) -0.0023(9) -0.0028(10)
C13 0.0468(14) 0.0400(15) 0.0266(12) 0.0021(11) -0.0005(11) -0.0082(12)
C14 0.0543(16) 0.0429(15) 0.0336(13) -0.0042(12) 0.0153(12) -0.0066(13)
C15 0.0365(13) 0.0388(14) 0.0443(14) -0.0046(12) 0.0124(11) 0.0001(11)
C16 0.0286(11) 0.0273(12) 0.0364(12) -0.0040(10) 0.0029(9) 0.0010(9)
C17 0.0314(13) 0.0526(16) 0.0467(15) -0.0052(13) -0.0046(11) 0.0111(12)
C21 0.0291(12) 0.0458(15) 0.0378(13) -0.0094(11) -0.0034(10) -0.0096(11)
C22 0.0237(11) 0.0305(12) 0.0377(13) -0.0079(10) 0.0026(9) -0.0025(9)
C23 0.0331(13) 0.0334(13) 0.0537(16) -0.0143(12) 0.0074(11) -0.0086(11)
C24 0.0458(15) 0.0244(13) 0.0642(18) 0.0012(12) 0.0121(13) -0.0028(11)
C25 0.0413(14) 0.0342(14) 0.0554(17) 0.0110(12) 0.0002(12) 0.0020(12)
C26 0.0321(12) 0.0350(13) 0.0413(14) 0.0079(11) -0.0056(10) -0.0034(10)
P1 0.0312(3) 0.0447(4) 0.0275(3) 0.0011(3) 0.0009(2) 0.0037(3)
F1A 0.036(3) 0.234(9) 0.094(5) -0.055(4) -0.016(2) -0.015(3)
F1B 0.024(3) 0.045(4) 0.27(2) -0.019(6) 0.027(6) 0.003(2)
F2A 0.051(6) 0.084(7) 0.19(2) -0.007(10) 0.071(10) -0.031(5)
F2B 0.081(4) 0.100(3) 0.113(5) -0.006(3) -0.064(3) 0.008(2)
F3A 0.118(5) 0.094(4) 0.056(3) 0.004(2) 0.045(3) -0.031(3)
F3B 0.111(7) 0.145(8) 0.094(5) 0.084(5) -0.041(4) -0.025(6)
F4A 0.044(4) 0.050(5) 0.276(15) 0.091(7) 0.047(6) 0.018(3)
F4B 0.083(4) 0.110(5) 0.143(6) -0.101(5) 0.003(4) 0.003(4)
F5A 0.083(4) 0.242(11) 0.051(3) -0.017(4) 0.046(3) -0.028(4)
F5B 0.43(3) 0.053(5) 0.051(4) 0.033(3) -0.052(9) -0.020(8)
F6A 0.258(18) 0.050(5) 0.123(9) -0.035(5) 0.063(7) 0.021(6)
F6B 0.057(4) 0.044(3) 0.316(18) -0.047(7) 0.016(5) 0.011(2)

_geom_special_details
;
 All esds (except the esd in the dihedral angle between two l.s. planes)
 are estimated using the full covariance matrix.  The cell esds are taken
 into account individually in the estimation of esds in distances, angles
 and torsion angles; correlations between esds in cell parameters are only
 used when they are defined by crystal symmetry.  An approximate (isotropic)
 treatment of cell esds is used for estimating esds involving l.s. planes.
;

loop_
 _geom_bond_atom_site_label_1
 _geom_bond_atom_site_label_2
 _geom_bond_distance
 _geom_bond_site_symmetry_2
 _geom_bond_publ_flag
Rh1 C5 2.066(2) . Y
Rh1 C6 2.069(2) . Y
Rh1 N2 2.0859(19) . Y
Rh1 C3 2.152(2) . Y
Rh1 C2 2.152(2) . Y
Rh1 N3 2.2356(18) . Y
Rh1 N1 2.2967(18) . Y
N1 C12 1.343(3) . Y
N1 C16 1.344(3) . Y
N2 C26 1.344(3) . Y
N2 C22 1.347(3) . Y
N3 C11 1.470(3) . Y
N3 C21 1.475(3) . Y
C1 C2 1.523(3) . Y
C1 C6 1.530(3) . Y
C1 C7 1.538(3) . Y
C2 C3 1.380(3) . Y
C3 C4 1.526(3) . Y
C4 C5 1.531(4) . Y
C4 C7 1.536(3) . Y
C5 C6 1.422(3) . Y
C11 C12 1.505(3) . Y
C12 C13 1.382(3) . Y
C13 C14 1.373(4) . Y
C14 C15 1.369(4) . Y
C15 C16 1.387(3) . Y
C16 C17 1.490(3) . Y
C21 C22 1.499(3) . Y
C22 C23 1.388(3) . Y
C23 C24 1.373(4) . Y
C24 C25 1.380(4) . Y
C25 C26 1.369(3) . Y
P1 F5B 1.489(6) . Y
P1 F6A 1.507(10) . Y
P1 F2A 1.528(11) . Y
P1 F4A 1.541(8) . Y
P1 F1A 1.543(4) . Y
P1 F6B 1.547(8) . Y
P1 F3A 1.548(3) . Y
P1 F5A 1.552(5) . Y
P1 F2B 1.558(4) . Y
P1 F3B 1.569(5) . Y
P1 F4B 1.573(6) . Y
P1 F1B 1.579(6) . Y

loop_
 _geom_angle_atom_site_label_1
 _geom_angle_atom_site_label_2
 _geom_angle_atom_site_label_3
 _geom_angle
 _geom_angle_site_symmetry_1
 _geom_angle_site_symmetry_3
 _geom_angle_publ_flag
C5 Rh1 C6 40.24(9) . . Y
C5 Rh1 N2 101.17(9) . . Y
C6 Rh1 N2 96.28(9) . . Y
C5 Rh1 C3 66.50(10) . . Y
C6 Rh1 C3 79.68(9) . . Y
N2 Rh1 C3 165.12(8) . . Y
C5 Rh1 C2 79.60(9) . . Y
C6 Rh1 C2 66.31(9) . . Y
N2 Rh1 C2 152.46(8) . . Y
C3 Rh1 C2 37.39(9) . . Y
C5 Rh1 N3 168.32(8) . . Y
C6 Rh1 N3 128.08(8) . . Y
N2 Rh1 N3 78.61(7) . . Y
C3 Rh1 N3 115.21(8) . . Y
C2 Rh1 N3 95.17(8) . . Y
C5 Rh1 N1 120.10(8) . . Y
C6 Rh1 N1 159.69(8) . . Y
N2 Rh1 N1 93.07(7) . . Y
C3 Rh1 N1 86.68(8) . . Y
C2 Rh1 N1 110.53(8) . . Y
N3 Rh1 N1 71.48(7) . . Y
C12 N1 C16 119.13(19) . . Y
C12 N1 Rh1 113.55(14) . . Y
C16 N1 Rh1 126.11(14) . . Y
C26 N2 C22 118.3(2) . . Y
C26 N2 Rh1 123.91(16) . . Y
C22 N2 Rh1 117.58(16) . . Y
C11 N3 C21 111.98(19) . . Y
C11 N3 Rh1 107.93(14) . . Y
C21 N3 Rh1 109.08(14) . . Y
C2 C1 C6 98.33(18) . . Y
C2 C1 C7 101.39(19) . . Y
C6 C1 C7 102.0(2) . . Y
C3 C2 C1 106.6(2) . . Y
C3 C2 Rh1 71.30(13) . . Y
C1 C2 Rh1 96.06(15) . . Y
C2 C3 C4 106.4(2) . . Y
C2 C3 Rh1 71.31(13) . . Y
C4 C3 Rh1 95.84(14) . . Y
C3 C4 C5 98.42(17) . . Y
C3 C4 C7 101.4(2) . . Y
C5 C4 C7 101.9(2) . . Y
C6 C5 C4 105.7(2) . . Y
C6 C5 Rh1 69.97(12) . . Y
C4 C5 Rh1 99.22(15) . . Y
C5 C6 C1 105.5(2) . . Y
C5 C6 Rh1 69.79(13) . . Y
C1 C6 Rh1 99.28(15) . . Y
C4 C7 C1 93.87(18) . . Y
N3 C11 C12 109.83(18) . . Y
N1 C12 C13 122.0(2) . . Y
N1 C12 C11 115.8(2) . . Y
C13 C12 C11 122.2(2) . . Y
C14 C13 C12 118.9(2) . . Y
C15 C14 C13 119.3(2) . . Y
C14 C15 C16 119.8(2) . . Y
N1 C16 C15 120.9(2) . . Y
N1 C16 C17 117.4(2) . . Y
C15 C16 C17 121.8(2) . . Y
N3 C21 C22 113.15(19) . . Y
N2 C22 C23 121.1(2) . . Y
N2 C22 C21 117.5(2) . . Y
C23 C22 C21 121.3(2) . . Y
C24 C23 C22 119.8(2) . . Y
C23 C24 C25 119.0(2) . . Y
C26 C25 C24 118.7(3) . . Y
N2 C26 C25 123.1(2) . . Y
F5B P1 F6A 91.0(8) . . Y
F5B P1 F2A 85.0(14) . . Y
F6A P1 F2A 87.8(9) . . Y
F5B P1 F4A 52.9(8) . . Y
F6A P1 F4A 143.4(11) . . Y
F2A P1 F4A 94.0(5) . . Y
F5B P1 F1A 63.8(9) . . Y
F6A P1 F1A 73.9(8) . . Y
F2A P1 F1A 142.9(13) . . Y
F4A P1 F1A 83.3(7) . . Y
F5B P1 F6B 120.4(12) . . Y
F6A P1 F6B 29.5(7) . . Y
F2A P1 F6B 87.6(5) . . Y
F4A P1 F6B 172.8(13) . . Y
F1A P1 F6B 91.2(6) . . Y
F5B P1 F3A 132.9(11) . . Y
F6A P1 F3A 115.2(5) . . Y
F2A P1 F3A 131.3(12) . . Y
F4A P1 F3A 90.6(6) . . Y
F1A P1 F3A 85.8(4) . . Y
F6B P1 F3A 93.6(9) . . Y
F5B P1 F5A 42.5(8) . . Y
F6A P1 F5A 68.3(7) . . Y
F2A P1 F5A 50.7(12) . . Y
F4A P1 F5A 84.7(7) . . Y
F1A P1 F5A 92.2(5) . . Y
F6B P1 F5A 90.8(10) . . Y
F3A P1 F5A 175.1(5) . . Y
F5B P1 F2B 111.2(9) . . Y
F6A P1 F2B 109.1(8) . . Y
F2A P1 F2B 34.7(8) . . Y
F4A P1 F2B 91.8(6) . . Y
F1A P1 F2B 174.5(5) . . Y
F6B P1 F2B 93.4(6) . . Y
F3A P1 F2B 96.8(5) . . Y
F5A P1 F2B 84.8(5) . . Y
F5B P1 F3B 175.6(11) . . Y
F6A P1 F3B 86.2(7) . . Y
F2A P1 F3B 91.4(11) . . Y
F4A P1 F3B 130.2(9) . . Y
F1A P1 F3B 118.5(5) . . Y
F6B P1 F3B 56.7(11) . . Y
F3A P1 F3B 51.5(3) . . Y
F5A P1 F3B 133.1(6) . . Y
F2B P1 F3B 66.7(4) . . Y
F5B P1 F4B 80.4(6) . . Y
F6A P1 F4B 171.2(8) . . Y
F2A P1 F4B 93.1(7) . . Y
F4A P1 F4B 27.8(6) . . Y
F1A P1 F4B 100.5(4) . . Y
F6B P1 F4B 159.2(12) . . Y
F3A P1 F4B 70.4(4) . . Y
F5A P1 F4B 105.6(6) . . Y
F2B P1 F4B 75.9(4) . . Y
F3B P1 F4B 102.5(6) . . Y
F5B P1 F1B 96.5(13) . . Y
F6A P1 F1B 88.4(8) . . Y
F2A P1 F1B 175.9(6) . . Y
F4A P1 F1B 90.0(4) . . Y
F1A P1 F1B 36.6(6) . . Y
F6B P1 F1B 88.3(3) . . Y
F3A P1 F1B 49.7(9) . . Y
F5A P1 F1B 128.7(10) . . Y
F2B P1 F1B 146.4(10) . . Y
F3B P1 F1B 86.9(8) . . Y
F4B P1 F1B 91.0(5) . . Y

_diffrn_reflns_theta_full              27.53
_refine_diff_density_max    0.475
_refine_diff_density_min   -0.430
_refine_diff_density_rms    0.062
_publ_section_experimental
;
Crystal colour: transparent yellow, crystal shape: rough fragment.
Least-squares refinement using calculated weights:

w=1/[\s^2^(Fo^2^)+(0.0272P)^2^+1.5373P] where P=(Fo^2^+2Fc^2^)/3                

The PF~6~ moiety is rather disordered. It was attempted to describe this
disorder but the result is not very satisfactory and should be used
carefully.
;

#==============================================================================
#===END

data_HET12A

_audit_creation_method            'SHELXL, adapted and expanded'
_audit_creation_date              2003-12-09
_chemical_name_systematic
;
 ?
;
_chemical_name_common             ?
_chemical_formula_moiety          ?
_chemical_formula_sum
 'C44 H44 B Cl N3 O Rh'
_chemical_formula_weight          779.99

loop_
 _atom_type_symbol
 _atom_type_description
 _atom_type_scat_dispersion_real
 _atom_type_scat_dispersion_imag
 _atom_type_scat_source
 'C'  'C'   0.0033   0.0016
 'International Tables Vol C Tables 4.2.6.8 and 6.1.1.4'
 'H'  'H'   0.0000   0.0000
 'International Tables Vol C Tables 4.2.6.8 and 6.1.1.4'
 'N'  'N'   0.0061   0.0033
 'International Tables Vol C Tables 4.2.6.8 and 6.1.1.4'
 'Rh'  'Rh'  -1.1178   0.9187
 'International Tables Vol C Tables 4.2.6.8 and 6.1.1.4'
 'B'  'B'   0.0013   0.0007
 'International Tables Vol C Tables 4.2.6.8 and 6.1.1.4'
 'Cl'  'Cl'   0.1484   0.1585
 'International Tables Vol C Tables 4.2.6.8 and 6.1.1.4'
 'O'  'O'   0.0106   0.0060
 'International Tables Vol C Tables 4.2.6.8 and 6.1.1.4'

_symmetry_cell_setting            triclinic
_symmetry_space_group_name_H-M    'P -1'

loop_
 _symmetry_equiv_pos_as_xyz
 'x, y, z'
 '-x, -y, -z'

_cell_length_a                    10.2395(5)
_cell_length_b                    13.8332(7)
_cell_length_c                    14.5277(8)
_cell_angle_alpha                 68.189(4)
_cell_angle_beta                  86.382(5)
_cell_angle_gamma                 75.528(4)
_cell_volume                      1848.84(17)
_cell_formula_units_Z             2
_cell_measurement_temperature     208(2)
_cell_measurement_reflns_used     64
_cell_measurement_theta_min       3.540
_cell_measurement_theta_max       22.500

_exptl_crystal_description        'rough fragment'
_exptl_crystal_colour             'transparent brown yellow'
_exptl_crystal_size_max           0.27
_exptl_crystal_size_mid           0.21
_exptl_crystal_size_min           0.08
#_exptl_crystal_density_meas      'not measured'
_exptl_crystal_density_diffrn     1.401
_exptl_crystal_density_method     'not measured'
_exptl_crystal_F_000              808
_exptl_absorpt_coefficient_mu     0.573
_exptl_absorpt_correction_type    'SADABS multiscan (Sheldrick, 1996)'
_exptl_absorpt_correction_T_min   1.000
_exptl_absorpt_correction_T_max   1.000

_exptl_special_details
;
 ?
;

_diffrn_ambient_temperature       208(2)
_diffrn_radiation_wavelength      0.71073
_diffrn_radiation_type            MoK\a
_diffrn_radiation_source          'fine-focus sealed tube'
_diffrn_radiation_monochromator   graphite
_diffrn_measurement_device        'Nonius KappaCCD'
_diffrn_measurement_method        'area detector \f and \w scan'
_diffrn_detector_area_resol_mean  18.4
_diffrn_standards_number          0
_diffrn_standards_interval_time   0
_diffrn_standards_decay_%         0.000
_diffrn_reflns_number             27741
_diffrn_reflns_av_R_equivalents   0.0528
_diffrn_reflns_av_sigmaI/netI     0.0439
_diffrn_reflns_limit_h_min        -11
_diffrn_reflns_limit_h_max        11
_diffrn_reflns_limit_k_min        -14
_diffrn_reflns_limit_k_max        14
_diffrn_reflns_limit_l_min        -15
_diffrn_reflns_limit_l_max        15
_diffrn_reflns_theta_min          3.54
_diffrn_reflns_theta_max          22.50
_reflns_number_total              4822
_reflns_number_gt                 3681
_reflns_number_observed           3681
_reflns_threshold_expression      >2sigma(I)
_reflns_observed_criterion        >2sigma(I)

_computing_data_collection
;
Nonius "Collect" program suite (Nonius, 1999)
;
_computing_cell_refinement        ?
_computing_data_reduction
;
Nonius "EvalCCD" program suite (Duisenberg, 1998)
;
_computing_structure_solution
;
DIRDIF (Beurskens et al., 1996),
PATTY (Beurskens et al., 1987)
;
_computing_structure_refinement   'SHELXL-97 (Sheldrick, 1997)'
_computing_molecular_graphics
;
PLATON (Spek, 2003)
;
_computing_publication_material   ?

_refine_special_details
;
 Refinement of F^2^ against ALL reflections.  The weighted R-factor wR and
 goodness of fit S are based on F^2^, conventional R-factors R are based
 on F, with F set to zero for negative F^2^. The threshold expression of
 F^2^ > 2sigma(F^2^) is used only for calculating R-factors(gt) etc. and is
 not relevant to the choice of reflections for refinement.  R-factors based
 on F^2^ are statistically about twice as large as those based on F, and R-
 factors based on ALL data will be even larger.
;

_refine_ls_structure_factor_coef  Fsqd
_refine_ls_matrix_type            full
_refine_ls_weighting_scheme       calc
_refine_ls_weighting_details      
;
w=1/[\s^2^(Fo^2^)+(0.0838P)^2^+4.9384P] where P=(Fo^2^+2Fc^2^)/3
;
_atom_sites_solution_primary      direct
_atom_sites_solution_secondary    difmap
_atom_sites_solution_hydrogens    geom
_refine_ls_hydrogen_treatment     mixed
_refine_ls_extinction_method      none
_refine_ls_extinction_coef        ?
_refine_ls_number_reflns          4822
_refine_ls_number_parameters      462
_refine_ls_number_restraints      0
_refine_ls_R_factor_all           0.0902
_refine_ls_R_factor_gt            0.0653
_refine_ls_R_factor_obs           0.0653
_refine_ls_wR_factor_ref          0.1738
_refine_ls_wR_factor_all          0.1738
_refine_ls_wR_factor_gt           0.1577
_refine_ls_wR_factor_obs          0.1577
_refine_ls_goodness_of_fit_ref    1.041
_refine_ls_goodness_of_fit_all    1.041
_refine_ls_restrained_S_all       1.041
_refine_ls_shift/su_max           0.285
_refine_ls_shift/esd_max          0.285
_refine_ls_shift/su_mean          0.014
_refine_ls_shift/esd_mean         0.014

loop_
 _atom_site_label
 _atom_site_type_symbol
 _atom_site_fract_x
 _atom_site_fract_y
 _atom_site_fract_z
 _atom_site_U_iso_or_equiv
 _atom_site_adp_type
 _atom_site_occupancy
 _atom_site_calc_flag
 _atom_site_refinement_flags
 _atom_site_disorder_assembly
 _atom_site_disorder_group
Rh1 Rh 0.11887(6) 0.36889(4) 0.06499(4) 0.0616(3) Uani 1 d . . .
Cl1 Cl 0.1062(2) 0.55140(15) 0.03873(17) 0.0825(7) Uani 1 d . . .
C1 C 0.3902(19) 0.3674(12) 0.1558(18) 0.250(12) Uani 1 d . . .
H1 H 0.4152 0.4204 0.0943 0.300 Uiso 1 calc R . .
C2 C 0.3042(10) 0.3036(7) 0.1400(8) 0.109(4) Uani 1 d . . .
H2 H 0.3591 0.2719 0.0950 0.131 Uiso 1 calc R . .
C3 C 0.3192(14) 0.2071(10) 0.2358(10) 0.145(5) Uani 1 d . . .
H3 H 0.2358 0.2089 0.2741 0.174 Uiso 1 calc R . .
C4 C 0.4314(18) 0.2166(18) 0.2874(14) 0.218(12) Uani 1 d . . .
H4 H 0.4787 0.1493 0.3403 0.262 Uiso 1 calc R . .
C5 C 0.351(3) 0.3054(18) 0.3240(18) 0.37(2) Uani 1 d . . .
H5 H 0.3135 0.3011 0.3857 0.449 Uiso 1 calc R . .
C6 C 0.352(3) 0.404(2) 0.227(3) 0.37(3) Uani 1 d . . .
H6 H 0.3296 0.4764 0.2211 0.448 Uiso 1 calc R . .
C7 C 0.5130(13) 0.2628(13) 0.2107(15) 0.171(7) Uani 1 d . . .
H7A H 0.5464 0.2193 0.1702 0.205 Uiso 1 calc R . .
H7B H 0.5878 0.2811 0.2340 0.205 Uiso 1 calc R . .
O8 O 0.3646(10) 0.1066(6) 0.2158(6) 0.139(3) Uani 1 d . . .
H8 H 0.3908 0.1207 0.1581 0.209 Uiso 1 calc R . .
N1 N 0.2195(7) 0.3612(6) -0.0611(5) 0.0757(18) Uani 1 d . . .
N2 N 0.0066(6) 0.3373(5) 0.1930(5) 0.0771(19) Uani 1 d . . .
N3 N 0.1115(7) 0.2183(5) 0.0829(6) 0.084(2) Uani 1 d . . .
H3A H 0.1873 0.1706 0.1185 0.101 Uiso 1 calc R . .
C11 C 0.1112(11) 0.2126(7) -0.0157(9) 0.106(3) Uani 1 d . . .
H11A H 0.0189 0.2393 -0.0440 0.127 Uiso 1 calc R . .
H11B H 0.1438 0.1377 -0.0103 0.127 Uiso 1 calc R . .
C12 C 0.2002(11) 0.2788(8) -0.0823(8) 0.096(3) Uani 1 d . . .
C13 C 0.2596(17) 0.2589(12) -0.1639(12) 0.147(5) Uani 1 d . . .
H13 H 0.2448 0.2016 -0.1784 0.177 Uiso 1 calc R . .
C14 C 0.3381(17) 0.3200(15) -0.2226(12) 0.151(6) Uani 1 d . . .
H14 H 0.3777 0.3053 -0.2776 0.181 Uiso 1 calc R . .
C15 C 0.3598(12) 0.4021(14) -0.2025(9) 0.136(5) Uani 1 d . . .
H15 H 0.4142 0.4462 -0.2424 0.164 Uiso 1 calc R . .
C16 C 0.2972(11) 0.4188(9) -0.1189(8) 0.092(3) Uani 1 d . . .
C17 C 0.3349(14) 0.4951(13) -0.0987(12) 0.184(7) Uani 1 d . . .
H17A H 0.2619 0.5596 -0.1173 0.276 Uiso 1 calc R . .
H17B H 0.4139 0.5109 -0.1360 0.276 Uiso 1 calc R . .
H17C H 0.3562 0.4700 -0.0283 0.276 Uiso 1 calc R . .
C21 C -0.0094(10) 0.1953(7) 0.1398(8) 0.103(3) Uani 1 d . . .
H21A H 0.0049 0.1175 0.1744 0.124 Uiso 1 calc R . .
H21B H -0.0872 0.2201 0.0937 0.124 Uiso 1 calc R . .
C22 C -0.0398(9) 0.2485(7) 0.2136(8) 0.089(3) Uani 1 d . . .
C23 C -0.1160(11) 0.2122(9) 0.2963(10) 0.106(3) Uani 1 d . . .
H23 H -0.1450 0.1490 0.3104 0.128 Uiso 1 calc R . .
C24 C -0.1472(12) 0.2679(13) 0.3551(10) 0.131(5) Uani 1 d . . .
H24 H -0.2024 0.2461 0.4093 0.157 Uiso 1 calc R . .
C25 C -0.0992(11) 0.3572(11) 0.3373(9) 0.117(4) Uani 1 d . . .
H25 H -0.1192 0.3935 0.3817 0.141 Uiso 1 calc R . .
C26 C -0.0199(9) 0.3971(10) 0.2534(7) 0.106(4) Uani 1 d . . .
H26 H 0.0118 0.4590 0.2402 0.127 Uiso 1 calc R . .
B1 B 0.8248(9) 0.2038(8) 0.6892(7) 0.071(2) Uani 1 d . . .
C31 C 0.7718(7) 0.1391(6) 0.6290(5) 0.0621(19) Uani 1 d . . .
C32 C 0.8545(7) 0.0608(6) 0.5992(5) 0.0639(19) Uani 1 d . . .
H32 H 0.9470 0.0403 0.6166 0.077 Uiso 1 calc R . .
C33 C 0.8088(8) 0.0117(7) 0.5456(6) 0.078(2) Uani 1 d . . .
H33 H 0.8699 -0.0403 0.5268 0.094 Uiso 1 calc R . .
C34 C 0.6749(9) 0.0381(8) 0.5195(7) 0.096(3) Uani 1 d . . .
H34 H 0.6426 0.0058 0.4819 0.115 Uiso 1 calc R . .
C35 C 0.5900(9) 0.1124(10) 0.5497(8) 0.116(4) Uani 1 d . . .
H35 H 0.4975 0.1316 0.5329 0.140 Uiso 1 calc R . .
C36 C 0.6369(8) 0.1603(8) 0.6047(7) 0.089(3) Uani 1 d . . .
H36 H 0.5744 0.2092 0.6264 0.106 Uiso 1 calc R . .
C41 C 0.7998(12) 0.3306(9) 0.6199(8) 0.101(3) Uani 1 d . . .
C42 C 0.6974(16) 0.3827(10) 0.5531(13) 0.168(6) Uani 1 d . . .
H42 H 0.6571 0.3490 0.5212 0.202 Uiso 1 calc R . .
C43 C 0.650(5) 0.509(3) 0.533(5) 0.76(7) Uani 1 d . . .
H43 H 0.5832 0.5458 0.5635 0.910 Uiso 1 calc R . .
C44 C 0.699(3) 0.531(3) 0.4911(14) 0.32(2) Uani 1 d . . .
H44 H 0.6773 0.5602 0.4228 0.379 Uiso 1 calc R . .
C45 C 0.836(2) 0.5192(13) 0.5377(15) 0.205(9) Uani 1 d . . .
H45 H 0.8833 0.5727 0.5241 0.246 Uiso 1 calc R . .
C46 C 0.8803(19) 0.3970(12) 0.6142(13) 0.182(6) Uani 1 d . . .
H46 H 0.9597 0.3723 0.6538 0.219 Uiso 1 calc R . .
C51 C 0.7450(8) 0.1948(7) 0.7902(6) 0.077(2) Uani 1 d . . .
C52 C 0.7384(9) 0.2689(8) 0.8378(8) 0.098(3) Uani 1 d . . .
H52 H 0.7790 0.3267 0.8085 0.118 Uiso 1 calc R . .
C53 C 0.6730(13) 0.2577(13) 0.9272(9) 0.137(5) Uani 1 d . . .
H53 H 0.6706 0.3066 0.9585 0.165 Uiso 1 calc R . .
C54 C 0.6102(17) 0.1708(19) 0.9700(11) 0.183(9) Uani 1 d . . .
H54 H 0.5617 0.1644 1.0282 0.219 Uiso 1 calc R . .
C55 C 0.6195(19) 0.0976(16) 0.9280(13) 0.184(8) Uani 1 d . . .
H55 H 0.5847 0.0369 0.9594 0.220 Uiso 1 calc R . .
C56 C 0.6810(12) 0.1131(9) 0.8379(8) 0.113(3) Uani 1 d . . .
H56 H 0.6793 0.0647 0.8069 0.135 Uiso 1 calc R . .
C61 C 0.9859(9) 0.1505(9) 0.7150(10) 0.099(3) Uani 1 d . . .
C62 C 1.0330(10) 0.0770(8) 0.8107(12) 0.129(5) Uani 1 d . . .
H62 H 0.9712 0.0645 0.8619 0.155 Uiso 1 calc R . .
C63 C 1.1686(16) 0.0222(11) 0.8318(19) 0.219(12) Uani 1 d . . .
H63 H 1.1995 -0.0261 0.8959 0.263 Uiso 1 calc R . .
C64 C 1.2589(18) 0.043(2) 0.750(3) 0.27(2) Uani 1 d . . .
H64 H 1.3499 0.0052 0.7598 0.323 Uiso 1 calc R . .
C65 C 1.2141(17) 0.116(2) 0.663(2) 0.254(19) Uani 1 d . . .
H65 H 1.2768 0.1318 0.6126 0.305 Uiso 1 calc R . .
C66 C 1.0808(10) 0.1709(12) 0.6405(12) 0.148(5) Uani 1 d . . .
H66 H 1.0537 0.2212 0.5763 0.178 Uiso 1 calc R . .

loop_
 _atom_site_aniso_label
 _atom_site_aniso_U_11
 _atom_site_aniso_U_22
 _atom_site_aniso_U_33
 _atom_site_aniso_U_23
 _atom_site_aniso_U_13
 _atom_site_aniso_U_12
Rh1 0.0657(4) 0.0448(4) 0.0741(5) -0.0198(3) -0.0251(3) -0.0093(3)
Cl1 0.0837(13) 0.0530(11) 0.1168(17) -0.0347(11) -0.0461(12) -0.0097(9)
C1 0.233(18) 0.112(11) 0.37(3) -0.044(14) -0.23(2) 0.003(11)
C2 0.112(7) 0.082(6) 0.118(8) -0.003(6) -0.065(6) -0.034(5)
C3 0.145(10) 0.120(10) 0.155(12) -0.040(9) -0.073(9) -0.002(8)
C4 0.170(17) 0.26(2) 0.187(18) -0.131(18) -0.125(14) 0.128(17)
C5 0.59(5) 0.20(2) 0.27(3) -0.141(19) -0.30(3) 0.19(3)
C6 0.36(3) 0.28(3) 0.55(5) -0.34(4) -0.33(3) 0.18(2)
C7 0.088(9) 0.176(14) 0.26(2) -0.101(16) -0.092(11) 0.016(9)
O8 0.149(7) 0.094(5) 0.161(8) -0.051(5) -0.018(6) 0.007(5)
N1 0.072(4) 0.065(4) 0.087(5) -0.029(4) -0.022(4) -0.005(4)
N2 0.075(4) 0.068(4) 0.073(5) -0.002(4) -0.017(4) -0.022(3)
N3 0.102(5) 0.045(4) 0.102(6) -0.022(4) -0.037(4) -0.009(3)
C11 0.125(8) 0.063(6) 0.138(9) -0.050(6) -0.034(7) -0.009(6)
C12 0.109(7) 0.077(6) 0.098(7) -0.047(6) -0.025(6) 0.015(6)
C13 0.181(14) 0.125(11) 0.126(12) -0.069(10) -0.011(10) 0.019(10)
C14 0.157(14) 0.163(15) 0.110(11) -0.076(12) -0.001(9) 0.041(11)
C15 0.098(8) 0.185(15) 0.091(9) -0.042(9) 0.005(7) 0.012(9)
C16 0.089(7) 0.085(7) 0.097(8) -0.027(6) -0.023(6) -0.018(6)
C17 0.114(10) 0.157(14) 0.194(16) 0.025(12) 0.004(10) -0.022(10)
C21 0.098(7) 0.065(6) 0.136(9) -0.007(6) -0.028(6) -0.037(5)
C22 0.084(6) 0.072(6) 0.090(7) -0.007(5) -0.028(5) -0.014(5)
C23 0.090(7) 0.083(7) 0.109(9) 0.013(7) -0.007(7) -0.028(6)
C24 0.101(9) 0.136(12) 0.110(10) 0.003(9) -0.002(7) -0.023(8)
C25 0.103(8) 0.144(11) 0.093(8) -0.042(8) -0.009(7) -0.008(7)
C26 0.081(6) 0.145(9) 0.056(6) -0.025(6) -0.008(5) 0.023(6)
B1 0.061(5) 0.072(6) 0.081(6) -0.035(5) 0.005(5) -0.006(4)
C31 0.049(4) 0.071(5) 0.058(4) -0.020(4) 0.003(3) -0.005(4)
C32 0.049(4) 0.074(5) 0.071(5) -0.029(4) -0.002(4) -0.012(4)
C33 0.061(5) 0.094(6) 0.087(6) -0.044(5) 0.009(4) -0.015(4)
C34 0.077(6) 0.136(8) 0.094(7) -0.066(6) -0.004(5) -0.021(6)
C35 0.055(5) 0.180(11) 0.130(9) -0.085(9) -0.016(5) -0.008(6)
C36 0.056(5) 0.118(7) 0.096(7) -0.056(6) -0.007(4) 0.001(5)
C41 0.118(8) 0.087(7) 0.102(8) -0.041(6) 0.022(6) -0.029(7)
C42 0.149(12) 0.088(9) 0.201(15) -0.003(9) 0.039(11) 0.000(8)
C43 0.36(5) 0.17(3) 1.30(16) 0.27(5) -0.13(7) -0.10(3)
C44 0.24(3) 0.36(4) 0.115(13) 0.016(16) 0.059(15) 0.17(3)
C45 0.29(2) 0.122(12) 0.28(2) -0.117(14) 0.137(19) -0.144(14)
C46 0.227(17) 0.135(12) 0.206(16) -0.064(11) -0.005(13) -0.078(12)
C51 0.067(5) 0.080(6) 0.073(6) -0.025(5) -0.004(4) -0.001(4)
C52 0.086(6) 0.103(7) 0.104(8) -0.049(6) -0.011(6) 0.002(5)
C53 0.133(10) 0.180(14) 0.076(8) -0.066(9) -0.005(7) 0.031(9)
C54 0.149(13) 0.23(2) 0.078(10) 0.008(12) 0.046(9) 0.001(13)
C55 0.221(18) 0.192(18) 0.110(13) -0.035(11) 0.069(12) -0.049(14)
C56 0.139(9) 0.100(8) 0.085(7) -0.022(6) 0.008(7) -0.023(7)
C61 0.060(6) 0.104(7) 0.169(10) -0.092(8) -0.006(7) -0.014(5)
C62 0.081(7) 0.071(6) 0.246(15) -0.074(8) -0.052(8) 0.003(5)
C63 0.105(11) 0.114(10) 0.47(4) -0.172(17) -0.125(16) 0.040(9)
C64 0.047(9) 0.26(3) 0.64(6) -0.35(4) -0.044(18) 0.022(12)
C65 0.066(13) 0.39(4) 0.50(5) -0.39(4) 0.056(16) -0.053(15)
C66 0.064(7) 0.227(14) 0.238(15) -0.175(13) 0.046(8) -0.056(8)

_geom_special_details
;
 All esds (except the esd in the dihedral angle between two l.s. planes)
 are estimated using the full covariance matrix.  The cell esds are taken
 into account individually in the estimation of esds in distances, angles
 and torsion angles; correlations between esds in cell parameters are only
 used when they are defined by crystal symmetry.  An approximate (isotropic)
 treatment of cell esds is used for estimating esds involving l.s. planes.
;

loop_
 _geom_bond_atom_site_label_1
 _geom_bond_atom_site_label_2
 _geom_bond_distance
 _geom_bond_site_symmetry_2
 _geom_bond_publ_flag
Rh1 N3 2.021(6) . Y
Rh1 N1 2.068(7) . Y
Rh1 C2 2.069(8) . Y
Rh1 N2 2.086(7) . Y
Rh1 Cl1 2.3799(18) . Y
Rh1 Cl1 2.5945(18) 2_565 Y
Cl1 Rh1 2.5944(18) 2_565 Y
C1 C6 1.31(3) . Y
C1 C2 1.473(16) . Y
C1 C7 1.634(19) . Y
C2 C3 1.511(15) . Y
C3 C4 1.47(2) . Y
C3 O8 1.481(14) . Y
C4 C7 1.40(2) . Y
C4 C5 1.55(3) . Y
C5 C6 1.55(5) . Y
N1 C16 1.307(12) . Y
N1 C12 1.348(11) . Y
N2 C22 1.351(11) . Y
N2 C26 1.387(12) . Y
N3 C11 1.464(12) . Y
N3 C21 1.480(12) . Y
C11 C12 1.501(14) . Y
C12 C13 1.384(16) . Y
C13 C14 1.343(19) . Y
C14 C15 1.34(2) . Y
C15 C16 1.406(16) . Y
C16 C17 1.340(18) . Y
C21 C22 1.488(13) . Y
C22 C23 1.391(14) . Y
C23 C24 1.325(16) . Y
C24 C25 1.373(16) . Y
C25 C26 1.432(15) . Y
B1 C51 1.612(12) . Y
B1 C41 1.629(14) . Y
B1 C61 1.635(13) . Y
B1 C31 1.657(12) . Y
C31 C36 1.379(10) . Y
C31 C32 1.386(10) . Y
C32 C33 1.373(10) . Y
C33 C34 1.367(11) . Y
C34 C35 1.359(13) . Y
C35 C36 1.381(12) . Y
C41 C42 1.338(18) . Y
C41 C46 1.358(17) . Y
C42 C43 1.61(4) . Y
C43 C44 0.78(6) . Y
C44 C45 1.54(3) . Y
C45 C46 1.61(2) . Y
C51 C56 1.385(13) . Y
C51 C52 1.422(12) . Y
C52 C53 1.397(14) . Y
C53 C54 1.42(2) . Y
C54 C55 1.35(2) . Y
C55 C56 1.382(17) . Y
C61 C66 1.404(15) . Y
C61 C62 1.410(16) . Y
C62 C63 1.396(16) . Y
C63 C64 1.44(4) . Y
C64 C65 1.32(5) . Y
C65 C66 1.38(2) . Y

loop_
 _geom_angle_atom_site_label_1
 _geom_angle_atom_site_label_2
 _geom_angle_atom_site_label_3
 _geom_angle
 _geom_angle_site_symmetry_1
 _geom_angle_site_symmetry_3
 _geom_angle_publ_flag
N3 Rh1 N1 82.2(3) . . Y
N3 Rh1 C2 88.0(3) . . Y
N1 Rh1 C2 87.4(4) . . Y
N3 Rh1 N2 82.1(3) . . Y
N1 Rh1 N2 164.1(3) . . Y
C2 Rh1 N2 94.8(4) . . Y
N3 Rh1 Cl1 174.7(2) . . Y
N1 Rh1 Cl1 98.9(2) . . Y
C2 Rh1 Cl1 97.2(3) . . Y
N2 Rh1 Cl1 96.4(2) . . Y
N3 Rh1 Cl1 91.04(19) . 2_565 Y
N1 Rh1 Cl1 89.03(17) . 2_565 Y
C2 Rh1 Cl1 176.4(3) . 2_565 Y
N2 Rh1 Cl1 88.47(17) . 2_565 Y
Cl1 Rh1 Cl1 83.81(6) . 2_565 Y
Rh1 Cl1 Rh1 96.19(6) . 2_565 Y
C6 C1 C2 114(3) . . Y
C6 C1 C7 101.8(16) . . Y
C2 C1 C7 94.1(11) . . Y
C1 C2 C3 104.6(10) . . Y
C1 C2 Rh1 124.2(8) . . Y
C3 C2 Rh1 119.0(8) . . Y
C4 C3 O8 107.4(11) . . Y
C4 C3 C2 102.2(13) . . Y
O8 C3 C2 110.3(11) . . Y
C7 C4 C3 104.1(14) . . Y
C7 C4 C5 108(3) . . Y
C3 C4 C5 97.8(14) . . Y
C6 C5 C4 98(2) . . Y
C1 C6 C5 107.3(19) . . Y
C4 C7 C1 93.1(15) . . Y
C16 N1 C12 117.5(9) . . Y
C16 N1 Rh1 131.8(7) . . Y
C12 N1 Rh1 110.7(7) . . Y
C22 N2 C26 121.6(9) . . Y
C22 N2 Rh1 112.3(7) . . Y
C26 N2 Rh1 126.2(7) . . Y
C11 N3 C21 113.7(8) . . Y
C11 N3 Rh1 107.8(5) . . Y
C21 N3 Rh1 108.1(5) . . Y
N3 C11 C12 110.0(8) . . Y
N1 C12 C13 120.1(12) . . Y
N1 C12 C11 117.4(9) . . Y
C13 C12 C11 122.5(12) . . Y
C14 C13 C12 121.2(15) . . Y
C13 C14 C15 119.9(15) . . Y
C14 C15 C16 116.6(15) . . Y
N1 C16 C17 122.5(12) . . Y
N1 C16 C15 124.7(11) . . Y
C17 C16 C15 112.6(14) . . Y
N3 C21 C22 112.2(7) . . Y
N2 C22 C23 121.8(10) . . Y
N2 C22 C21 115.7(9) . . Y
C23 C22 C21 122.4(10) . . Y
C24 C23 C22 119.2(12) . . Y
C23 C24 C25 120.4(13) . . Y
C24 C25 C26 122.3(12) . . Y
N2 C26 C25 114.8(11) . . Y
C51 B1 C41 107.9(7) . . Y
C51 B1 C61 109.8(8) . . Y
C41 B1 C61 110.1(8) . . Y
C51 B1 C31 111.6(7) . . Y
C41 B1 C31 109.9(7) . . Y
C61 B1 C31 107.6(6) . . Y
C36 C31 C32 114.3(7) . . Y
C36 C31 B1 120.9(7) . . Y
C32 C31 B1 124.8(6) . . Y
C33 C32 C31 123.6(7) . . Y
C34 C33 C32 120.4(8) . . Y
C35 C34 C33 117.8(8) . . Y
C34 C35 C36 121.4(8) . . Y
C35 C36 C31 122.5(8) . . Y
C42 C41 C46 109.7(13) . . Y
C42 C41 B1 122.9(11) . . Y
C46 C41 B1 127.2(12) . . Y
C41 C42 C43 113(3) . . Y
C44 C43 C42 101(7) . . Y
C43 C44 C45 109(6) . . Y
C44 C45 C46 106.0(16) . . Y
C41 C46 C45 118.0(15) . . Y
C56 C51 C52 115.2(9) . . Y
C56 C51 B1 122.5(9) . . Y
C52 C51 B1 122.2(9) . . Y
C53 C52 C51 121.5(11) . . Y
C52 C53 C54 118.7(14) . . Y
C55 C54 C53 120.7(15) . . Y
C54 C55 C56 118.9(18) . . Y
C55 C56 C51 124.7(13) . . Y
C66 C61 C62 118.0(10) . . Y
C66 C61 B1 120.7(11) . . Y
C62 C61 B1 121.2(10) . . Y
C63 C62 C61 122.1(16) . . Y
C64 C63 C62 117(2) . . Y
C65 C64 C63 120.2(17) . . Y
C66 C65 C64 124(3) . . Y
C65 C66 C61 119.0(19) . . Y

_diffrn_reflns_theta_full              22.50
_refine_diff_density_max    1.178
_refine_diff_density_min   -0.403
_refine_diff_density_rms    0.081
_publ_section_experimental
;
Crystal colour: transparent brown yellow, crystal shape: rough fragment.
Least-squares refinement using calculated weights:

w=1/[\s^2^(Fo^2^)+(0.0838P)^2^+4.9384P] where P=(Fo^2^+2Fc^2^)/3                

It proved to be impossible to grow good quality crystals which is
reflected in the results of the crystal structure determination. The
structure shows considerable disorder which could not be described
adequately, efforts to do so resulted in unstable refinements. The
substituted norbordiene fragment (C1-C7, O8) shows very large
anisotropic displacement parameters and bond distances and angles should
be treated as being unreliable. The atomic type assigment of O8 and
the unsaturated double bond type assignment to C5-C6 is based solely
on chemical and spectroscopic evidence and is not supported by
crystallographic data.

Also the BPh~4~ moiety shows some unacceptably large anisotropic
displacement parameters but that is no reason not to trust its nature
or its presence in the structure.

Trials to solve the structure in P1 were not successful. It even proved
to be impossible to find the complete set of atomic parameters from the
available data.
;

#==============================================================================
#===END


data_HET27

_audit_creation_method            'SHELXL, adapted and expanded'
_audit_creation_date              2003-12-10
_chemical_name_systematic
;
 ?
;
_chemical_name_common             ?
_chemical_formula_moiety          ?
_chemical_formula_sum
 'C20 H23 Cl F6 N3 P Rh'
_chemical_formula_weight          588.74

loop_
 _atom_type_symbol
 _atom_type_description
 _atom_type_scat_dispersion_real
 _atom_type_scat_dispersion_imag
 _atom_type_scat_source
 'C'  'C'   0.0033   0.0016
 'International Tables Vol C Tables 4.2.6.8 and 6.1.1.4'
 'H'  'H'   0.0000   0.0000
 'International Tables Vol C Tables 4.2.6.8 and 6.1.1.4'
 'N'  'N'   0.0061   0.0033
 'International Tables Vol C Tables 4.2.6.8 and 6.1.1.4'
 'Rh'  'Rh'  -1.1178   0.9187
 'International Tables Vol C Tables 4.2.6.8 and 6.1.1.4'
 'P'  'P'   0.1023   0.0942
 'International Tables Vol C Tables 4.2.6.8 and 6.1.1.4'
 'F'  'F'   0.0171   0.0103
 'International Tables Vol C Tables 4.2.6.8 and 6.1.1.4'
 'Cl'  'Cl'   0.1484   0.1585
 'International Tables Vol C Tables 4.2.6.8 and 6.1.1.4'

_symmetry_cell_setting            monoclinic
_symmetry_space_group_name_H-M    'C 2/c'

loop_
 _symmetry_equiv_pos_as_xyz
 'x, y, z'
 '-x, y, -z+1/2'
 'x+1/2, y+1/2, z'
 '-x+1/2, y+1/2, -z+1/2'
 '-x, -y, -z'
 'x, -y, z-1/2'
 '-x+1/2, -y+1/2, -z'
 'x+1/2, -y+1/2, z-1/2'

_cell_length_a                    13.173(3)
_cell_length_b                    22.340(6)
_cell_length_c                    16.478(4)
_cell_angle_alpha                 90.00
_cell_angle_beta                  98.61(2)
_cell_angle_gamma                 90.00
_cell_volume                      4795(2)
_cell_formula_units_Z             8
_cell_measurement_temperature     208(2)
_cell_measurement_reflns_used     37
_cell_measurement_theta_min       3.100
_cell_measurement_theta_max       22.500

_exptl_crystal_description        'rough rod'
_exptl_crystal_colour             'transparent light brown yellow'
_exptl_crystal_size_max           0.21
_exptl_crystal_size_mid           0.06
_exptl_crystal_size_min           0.05
#_exptl_crystal_density_meas      'not measured'
_exptl_crystal_density_diffrn     1.631
_exptl_crystal_density_method     'not measured'
_exptl_crystal_F_000              2360
_exptl_absorpt_coefficient_mu     0.949
_exptl_absorpt_correction_type    'SADABS multiscan (Sheldrick, 1996)'
_exptl_absorpt_correction_T_min   1.000
_exptl_absorpt_correction_T_max   1.000

_exptl_special_details
;
 ?
;

_diffrn_ambient_temperature       208(2)
_diffrn_radiation_wavelength      0.71073
_diffrn_radiation_type            MoK\a
_diffrn_radiation_source          'fine-focus sealed tube'
_diffrn_radiation_monochromator   graphite
_diffrn_measurement_device        'Nonius KappaCCD'
_diffrn_measurement_method        'area detector \f and \w scan'
_diffrn_detector_area_resol_mean  18.4
_diffrn_standards_number          0
_diffrn_standards_interval_time   0
_diffrn_standards_decay_%         0.000
_diffrn_reflns_number             35268
_diffrn_reflns_av_R_equivalents   0.0993
_diffrn_reflns_av_sigmaI/netI     0.0476
_diffrn_reflns_limit_h_min        -14
_diffrn_reflns_limit_h_max        14
_diffrn_reflns_limit_k_min        -24
_diffrn_reflns_limit_k_max        24
_diffrn_reflns_limit_l_min        -17
_diffrn_reflns_limit_l_max        17
_diffrn_reflns_theta_min          3.10
_diffrn_reflns_theta_max          22.50
_reflns_number_total              3127
_reflns_number_gt                 2540
_reflns_number_observed           2540
_reflns_threshold_expression      >2sigma(I)
_reflns_observed_criterion        >2sigma(I)

_computing_data_collection
;
Nonius "Collect" program suite (Nonius, 1999)
;
_computing_cell_refinement        ?
_computing_data_reduction
;
Nonius "EvalCCD" program suite (Duisenberg, 1998)
;
_computing_structure_solution
;
DIRDIF (Beurskens et al., 1996),
PATTY (Beurskens et al., 1987)
;
_computing_structure_refinement   'SHELXL-97 (Sheldrick, 1997)'
_computing_molecular_graphics
;
PLATON (Spek, 2003),
;
_computing_publication_material   ?

_refine_special_details
;
 Refinement of F^2^ against ALL reflections.  The weighted R-factor wR and
 goodness of fit S are based on F^2^, conventional R-factors R are based
 on F, with F set to zero for negative F^2^. The threshold expression of
 F^2^ > 2sigma(F^2^) is used only for calculating R-factors(gt) etc. and is
 not relevant to the choice of reflections for refinement.  R-factors based
 on F^2^ are statistically about twice as large as those based on F, and R-
 factors based on ALL data will be even larger.
;

_refine_ls_structure_factor_coef  Fsqd
_refine_ls_matrix_type            full
_refine_ls_weighting_scheme       calc
_refine_ls_weighting_details      
;
w=1/[\s^2^(Fo^2^)+(0.0613P)^2^+47.0625P] where P=(Fo^2^+2Fc^2^)/3
;
_atom_sites_solution_primary      direct
_atom_sites_solution_secondary    difmap
_atom_sites_solution_hydrogens    geom
_refine_ls_hydrogen_treatment     mixed
_refine_ls_extinction_method      none
_refine_ls_extinction_coef        ?
_refine_ls_number_reflns          3127
_refine_ls_number_parameters      296
_refine_ls_number_restraints      0
_refine_ls_R_factor_all           0.0813
_refine_ls_R_factor_gt            0.0616
_refine_ls_R_factor_obs           0.0616
_refine_ls_wR_factor_ref          0.1467
_refine_ls_wR_factor_all          0.1467
_refine_ls_wR_factor_gt           0.1371
_refine_ls_wR_factor_obs          0.1371
_refine_ls_goodness_of_fit_ref    1.079
_refine_ls_goodness_of_fit_all    1.079
_refine_ls_restrained_S_all       1.079
_refine_ls_shift/su_max           0.001
_refine_ls_shift/esd_max          0.001
_refine_ls_shift/su_mean          0.000
_refine_ls_shift/esd_mean         0.000

loop_
 _atom_site_label
 _atom_site_type_symbol
 _atom_site_fract_x
 _atom_site_fract_y
 _atom_site_fract_z
 _atom_site_U_iso_or_equiv
 _atom_site_adp_type
 _atom_site_occupancy
 _atom_site_calc_flag
 _atom_site_refinement_flags
 _atom_site_disorder_assembly
 _atom_site_disorder_group
Rh1 Rh 0.11432(5) 0.04697(3) 0.48939(4) 0.0391(3) Uani 1 d . . .
Cl1 Cl -0.06156(16) 0.01229(9) 0.40327(12) 0.0476(5) Uani 1 d . . .
C1 C 0.2721(9) 0.1316(6) 0.5938(9) 0.092(4) Uani 1 d . . .
H1 H 0.2316 0.1426 0.6376 0.111 Uiso 1 calc R . .
C2 C 0.2516(7) 0.0699(4) 0.5591(5) 0.058(2) Uani 1 d . . .
H2 H 0.2590 0.0428 0.6072 0.070 Uiso 1 calc R . .
C3 C 0.3551(8) 0.0597(5) 0.5169(9) 0.116(6) Uani 1 d . . .
H3A H 0.3406 0.0582 0.4568 0.140 Uiso 1 calc R . .
H3B H 0.3941 0.0243 0.5381 0.140 Uiso 1 calc R . .
C4 C 0.4104(11) 0.1225(9) 0.5510(12) 0.149(8) Uani 1 d . . .
H4 H 0.4845 0.1199 0.5471 0.179 Uiso 1 calc R . .
C5 C 0.3687(15) 0.1592(11) 0.4971(11) 0.169(10) Uani 1 d . . .
H5 H 0.3901 0.1737 0.4488 0.203 Uiso 1 calc R . .
C6 C 0.2729(15) 0.1723(7) 0.5357(11) 0.131(6) Uani 1 d . . .
H6 H 0.2246 0.2029 0.5213 0.157 Uiso 1 calc R . .
C7 C 0.3987(10) 0.1158(9) 0.6273(9) 0.143(7) Uani 1 d . . .
H7A H 0.4343 0.1458 0.6647 0.171 Uiso 1 calc R . .
H7B H 0.4115 0.0751 0.6486 0.171 Uiso 1 calc R . .
N1 N 0.1854(5) -0.0188(3) 0.4301(4) 0.0460(17) Uani 1 d . . .
N2 N 0.0430(5) 0.1234(3) 0.5202(4) 0.0491(18) Uani 1 d . . .
N3 N 0.1414(5) 0.0964(3) 0.3937(4) 0.0450(17) Uani 1 d . . .
H3 H 0.2028 0.1163 0.4076 0.054 Uiso 1 calc R . .
C11 C 0.1495(7) 0.0563(4) 0.3243(5) 0.052(2) Uani 1 d . . .
H11A H 0.1920 0.0753 0.2876 0.062 Uiso 1 calc R . .
H11B H 0.0810 0.0497 0.2931 0.062 Uiso 1 calc R . .
C12 C 0.1953(6) -0.0022(4) 0.3526(5) 0.050(2) Uani 1 d . . .
C13 C 0.2394(8) -0.0379(6) 0.3016(7) 0.079(3) Uani 1 d . . .
H13 H 0.2445 -0.0251 0.2480 0.095 Uiso 1 calc R . .
C14 C 0.2765(10) -0.0923(7) 0.3283(11) 0.104(5) Uani 1 d . . .
H14 H 0.3053 -0.1177 0.2924 0.125 Uiso 1 calc R . .
C15 C 0.2723(9) -0.1103(5) 0.4058(10) 0.093(4) Uani 1 d . . .
H15 H 0.2996 -0.1475 0.4247 0.112 Uiso 1 calc R . .
C16 C 0.2266(8) -0.0724(5) 0.4580(7) 0.070(3) Uani 1 d . . .
C17 C 0.2326(12) -0.0940(7) 0.5350(9) 0.051(5) Uani 0.576(19) d P . .
H17A H 0.2624 -0.0639 0.5738 0.077 Uiso 0.576(19) calc PR . .
H17B H 0.2753 -0.1296 0.5405 0.077 Uiso 0.576(19) calc PR . .
H17C H 0.1643 -0.1041 0.5460 0.077 Uiso 0.576(19) calc PR . .
C21 C 0.0572(7) 0.1411(4) 0.3779(5) 0.056(2) Uani 1 d . . .
H21A H -0.0016 0.1233 0.3426 0.067 Uiso 1 calc R . .
H21B H 0.0805 0.1757 0.3492 0.067 Uiso 1 calc R . .
C22 C 0.0248(6) 0.1612(4) 0.4566(6) 0.049(2) Uani 1 d . . .
C23 C -0.0241(8) 0.2151(4) 0.4645(8) 0.074(3) Uani 1 d . . .
H23 H -0.0360 0.2421 0.4203 0.089 Uiso 1 calc R . .
C24 C -0.0553(9) 0.2283(5) 0.5395(10) 0.089(4) Uani 1 d . . .
H24 H -0.0913 0.2639 0.5459 0.107 Uiso 1 calc R . .
C25 C -0.0337(9) 0.1899(7) 0.6030(9) 0.097(4) Uani 1 d . . .
H25 H -0.0535 0.1989 0.6542 0.117 Uiso 1 calc R . .
C26 C 0.0158(8) 0.1393(5) 0.5926(7) 0.072(3) Uani 1 d . . .
C27 C 0.0331(19) 0.1130(11) 0.6622(16) 0.073(8) Uiso 0.424(19) d P . .
H27A H 0.0759 0.0781 0.6579 0.110 Uiso 0.424(19) calc PR . .
H27B H -0.0314 0.1006 0.6785 0.110 Uiso 0.424(19) calc PR . .
H27C H 0.0681 0.1402 0.7028 0.110 Uiso 0.424(19) calc PR . .
P P 0.7476(2) 0.22103(14) 0.26868(18) 0.0746(9) Uani 1 d . . .
F1 F 0.8226(8) 0.1703(4) 0.2953(5) 0.167(4) Uani 1 d . . .
F2 F 0.6821(7) 0.2773(4) 0.2410(5) 0.139(3) Uani 1 d . . .
F3 F 0.8439(9) 0.2570(6) 0.2625(8) 0.204(5) Uani 1 d . . .
F4 F 0.7388(9) 0.1992(6) 0.1818(5) 0.226(7) Uani 1 d . . .
F5 F 0.6461(9) 0.1926(6) 0.2820(9) 0.223(6) Uani 1 d . . .
F6 F 0.7551(7) 0.2409(4) 0.3601(4) 0.134(3) Uani 1 d . . .

loop_
 _atom_site_aniso_label
 _atom_site_aniso_U_11
 _atom_site_aniso_U_22
 _atom_site_aniso_U_33
 _atom_site_aniso_U_23
 _atom_site_aniso_U_13
 _atom_site_aniso_U_12
Rh1 0.0429(4) 0.0378(4) 0.0384(4) 0.0015(3) 0.0117(3) -0.0098(3)
Cl1 0.0472(12) 0.0515(13) 0.0450(12) 0.0099(10) 0.0096(9) -0.0107(10)
C1 0.067(8) 0.088(9) 0.124(11) -0.045(9) 0.021(7) -0.019(7)
C2 0.055(6) 0.065(6) 0.050(5) 0.005(5) -0.002(4) -0.026(5)
C3 0.041(6) 0.084(9) 0.205(15) -0.073(9) -0.045(8) 0.009(6)
C4 0.071(10) 0.22(2) 0.137(15) 0.064(14) -0.037(10) -0.098(11)
C5 0.107(14) 0.27(3) 0.118(13) 0.046(15) -0.020(11) -0.127(15)
C6 0.162(18) 0.084(11) 0.135(14) -0.008(10) -0.019(12) -0.024(11)
C7 0.087(10) 0.24(2) 0.091(10) 0.025(11) -0.015(8) -0.104(12)
N1 0.045(4) 0.035(4) 0.057(5) -0.003(3) 0.007(3) -0.005(3)
N2 0.052(4) 0.042(4) 0.057(5) -0.016(4) 0.021(4) -0.017(3)
N3 0.050(4) 0.044(4) 0.043(4) 0.006(3) 0.014(3) -0.013(3)
C11 0.066(6) 0.055(6) 0.037(5) 0.003(4) 0.019(4) -0.012(5)
C12 0.048(5) 0.054(6) 0.052(5) -0.009(5) 0.019(4) -0.009(4)
C13 0.070(7) 0.095(9) 0.075(7) -0.022(7) 0.021(6) 0.004(7)
C14 0.084(9) 0.091(11) 0.136(13) -0.054(10) 0.011(9) 0.013(8)
C15 0.075(8) 0.056(7) 0.140(12) -0.028(8) -0.012(8) 0.014(6)
C16 0.057(7) 0.054(6) 0.091(8) 0.001(6) -0.012(6) -0.012(5)
C17 0.058(10) 0.046(9) 0.051(10) 0.006(8) 0.014(8) 0.000(8)
C21 0.058(6) 0.049(5) 0.062(6) 0.023(5) 0.012(5) -0.007(5)
C22 0.045(5) 0.030(5) 0.071(6) 0.000(4) 0.009(4) -0.010(4)
C23 0.058(7) 0.045(6) 0.117(9) 0.000(6) 0.004(6) -0.010(5)
C24 0.064(8) 0.060(8) 0.148(13) -0.044(8) 0.036(8) -0.012(6)
C25 0.064(8) 0.128(12) 0.107(11) -0.061(10) 0.036(7) -0.034(8)
C26 0.054(6) 0.084(8) 0.084(8) -0.047(7) 0.031(6) -0.020(6)
P 0.078(2) 0.0730(19) 0.077(2) -0.0106(15) 0.0251(15) 0.0235(17)
F1 0.231(10) 0.126(7) 0.128(6) -0.041(5) -0.024(6) 0.121(7)
F2 0.181(8) 0.135(7) 0.105(5) 0.022(5) 0.036(5) 0.085(6)
F3 0.156(10) 0.210(12) 0.257(13) 0.050(10) 0.067(9) -0.047(8)
F4 0.201(10) 0.341(15) 0.115(6) -0.128(8) -0.049(6) 0.178(11)
F5 0.164(10) 0.219(12) 0.301(16) -0.027(11) 0.086(10) -0.083(9)
F6 0.145(7) 0.172(8) 0.090(5) -0.008(5) 0.035(5) 0.084(6)

_geom_special_details
;
 All esds (except the esd in the dihedral angle between two l.s. planes)
 are estimated using the full covariance matrix.  The cell esds are taken
 into account individually in the estimation of esds in distances, angles
 and torsion angles; correlations between esds in cell parameters are only
 used when they are defined by crystal symmetry.  An approximate (isotropic)
 treatment of cell esds is used for estimating esds involving l.s. planes.
;

loop_
 _geom_bond_atom_site_label_1
 _geom_bond_atom_site_label_2
 _geom_bond_distance
 _geom_bond_site_symmetry_2
 _geom_bond_publ_flag
Rh1 N3 2.000(6) . Y
Rh1 N2 2.050(7) . Y
Rh1 C2 2.057(8) . Y
Rh1 N1 2.065(7) . Y
Rh1 Cl1 2.394(2) 5_556 Y
Rh1 Cl1 2.645(2) . Y
Cl1 Rh1 2.394(2) 5_556 Y
C1 C6 1.321(18) . Y
C1 C2 1.499(14) . Y
C1 C7 1.713(19) . Y
C2 C3 1.637(15) . Y
C3 C4 1.640(19) . Y
C4 C5 1.27(2) . Y
C4 C7 1.298(19) . Y
C5 C6 1.52(2) . Y
N1 C12 1.354(10) . Y
N1 C16 1.365(12) . Y
N2 C22 1.338(11) . Y
N2 C26 1.344(11) . Y
N3 C11 1.470(10) . Y
N3 C21 1.487(11) . Y
C11 C12 1.486(12) . Y
C12 C13 1.351(13) . Y
C13 C14 1.359(17) . Y
C14 C15 1.348(18) . Y
C15 C16 1.405(16) . Y
C16 C17 1.349(16) . Y
C21 C22 1.494(12) . Y
C22 C23 1.380(13) . Y
C23 C24 1.392(16) . Y
C24 C25 1.351(18) . Y
C25 C26 1.330(17) . Y
C26 C27 1.28(2) . Y
P F4 1.500(8) . Y
P F3 1.518(10) . Y
P F5 1.524(10) . Y
P F1 1.525(7) . Y
P F2 1.555(7) . Y
P F6 1.559(8) . Y

loop_
 _geom_angle_atom_site_label_1
 _geom_angle_atom_site_label_2
 _geom_angle_atom_site_label_3
 _geom_angle
 _geom_angle_site_symmetry_1
 _geom_angle_site_symmetry_3
 _geom_angle_publ_flag
N3 Rh1 N2 82.9(3) . . Y
N3 Rh1 C2 93.3(3) . . Y
N2 Rh1 C2 92.9(3) . . Y
N3 Rh1 N1 82.7(3) . . Y
N2 Rh1 N1 165.3(3) . . Y
C2 Rh1 N1 91.1(3) . . Y
N3 Rh1 Cl1 173.4(2) . 5_556 Y
N2 Rh1 Cl1 94.8(2) . 5_556 Y
C2 Rh1 Cl1 93.0(3) . 5_556 Y
N1 Rh1 Cl1 99.1(2) . 5_556 Y
N3 Rh1 Cl1 89.1(2) . . Y
N2 Rh1 Cl1 88.9(2) . . Y
C2 Rh1 Cl1 177.2(3) . . Y
N1 Rh1 Cl1 87.73(19) . . Y
Cl1 Rh1 Cl1 84.64(7) 5_556 . Y
Rh1 Cl1 Rh1 95.35(7) 5_556 . Y
C6 C1 C2 112.2(12) . . Y
C6 C1 C7 105.2(12) . . Y
C2 C1 C7 92.6(10) . . Y
C1 C2 C3 100.1(8) . . Y
C1 C2 Rh1 122.3(8) . . Y
C3 C2 Rh1 116.5(6) . . Y
C2 C3 C4 95.2(10) . . Y
C5 C4 C7 131(2) . . Y
C5 C4 C3 100.8(14) . . Y
C7 C4 C3 97.0(13) . . Y
C4 C5 C6 97.4(16) . . Y
C1 C6 C5 105.5(16) . . Y
C4 C7 C1 85.1(11) . . Y
C12 N1 C16 117.9(8) . . Y
C12 N1 Rh1 111.5(5) . . Y
C16 N1 Rh1 130.5(7) . . Y
C22 N2 C26 119.3(9) . . Y
C22 N2 Rh1 111.5(5) . . Y
C26 N2 Rh1 129.2(7) . . Y
C11 N3 C21 114.3(7) . . Y
C11 N3 Rh1 108.6(5) . . Y
C21 N3 Rh1 107.0(5) . . Y
N3 C11 C12 111.4(7) . . Y
C13 C12 N1 122.5(9) . . Y
C13 C12 C11 121.0(9) . . Y
N1 C12 C11 116.4(7) . . Y
C12 C13 C14 119.5(11) . . Y
C15 C14 C13 120.7(12) . . Y
C14 C15 C16 118.8(12) . . Y
C17 C16 N1 126.5(12) . . Y
C17 C16 C15 112.9(12) . . Y
N1 C16 C15 120.5(11) . . Y
N3 C21 C22 110.6(7) . . Y
N2 C22 C23 120.5(9) . . Y
N2 C22 C21 116.7(7) . . Y
C23 C22 C21 122.7(9) . . Y
C22 C23 C24 118.2(11) . . Y
C25 C24 C23 119.8(11) . . Y
C26 C25 C24 119.4(12) . . Y
C27 C26 C25 107.5(15) . . Y
C27 C26 N2 129.8(16) . . Y
C25 C26 N2 122.6(12) . . Y
F4 P F3 93.1(8) . . Y
F4 P F5 93.3(8) . . Y
F3 P F5 171.6(8) . . Y
F4 P F1 89.3(5) . . Y
F3 P F1 84.3(7) . . Y
F5 P F1 101.2(8) . . Y
F4 P F2 91.3(5) . . Y
F3 P F2 89.1(6) . . Y
F5 P F2 85.4(7) . . Y
F1 P F2 173.4(7) . . Y
F4 P F6 177.4(8) . . Y
F3 P F6 88.9(7) . . Y
F5 P F6 84.8(7) . . Y
F1 P F6 89.4(4) . . Y
F2 P F6 90.3(4) . . Y

_diffrn_reflns_theta_full              22.50
_refine_diff_density_max    0.611
_refine_diff_density_min   -0.421
_refine_diff_density_rms    0.100
_publ_section_experimental
;
Crystal colour: transparent light brown yellow, crystal shape: rough rod.
Least-squares refinement using calculated weights:

w=1/[\s^2^(Fo^2^)+(0.0613P)^2^+47.0625P] where P=(Fo^2^+2Fc^2^)/3               

It proved to be impossible to grow good quality crystals which is
reflected in the results of the crystal structure determination. Only
weakly diffracting crystals were available.

Only one methylpyridine is present in the complex but the methyl was
found to be disordered over two positions, C17 and C27, with occupation
factors of 0.57 and 0.43 respectively. Besides that the structure shows
some more disorder which could not be described adequately, resulting in
some rather large thermal displacement parameters.

Some unidentified, disordered, and only partially occupied solvent
molecules were found. This electron density was accounted for by
applying the SQUEEZE procedure (Spek, 2003) which showed a void of
126 A^3^ containing 10 electrons.
;
